# Supplementary material for: Neuroprotection Induced by Energy and Protein-Energy Undernutrition Is Phase-Dependent After Focal Cerebral Ischemia in Mice
Source: Springer Nature journal article supplement (doi:10.1007/s12975-019-00700-3), 2019-03-18
Supplement: MOESM1 [file 16556972]

**Neuroprotection induced by energy and protein-energy undernutrition is  
phase-dependent after focal cerebral ischemia in mice**

Tayana Silva de Carvalho, MSc; Eduardo H. Sanchez-Mendoza, PhD; Luiza M.  
Nascentes Melo, MSc; Adriana R. Schultz Moreira, PhD; Maryam Sardari, PhD;  
Egor Dzyubenko, PhD; Christoph Kleinschnitz, MD; Dirk M. Hermann, MD  
Department of Neurology, University Hospital Essen, Essen, Germany

*Running title:* Neuroprotection by energy and protein-energy undernutrition

*Translational Stroke Research*

**Correspondence:**

Prof. Dirk M. Hermann, MD

Department of Neurology

University Hospital Essen

Hufelandstr. 55

D-45122 Essen, Germany

Phone: +49-201-723-2814, Fax: +49-201-723-5534

E-mail: [dirk.hermann@uk-essen.de](mailto:dirk.hermann@uk-essen.de)

Supplemental Figures:

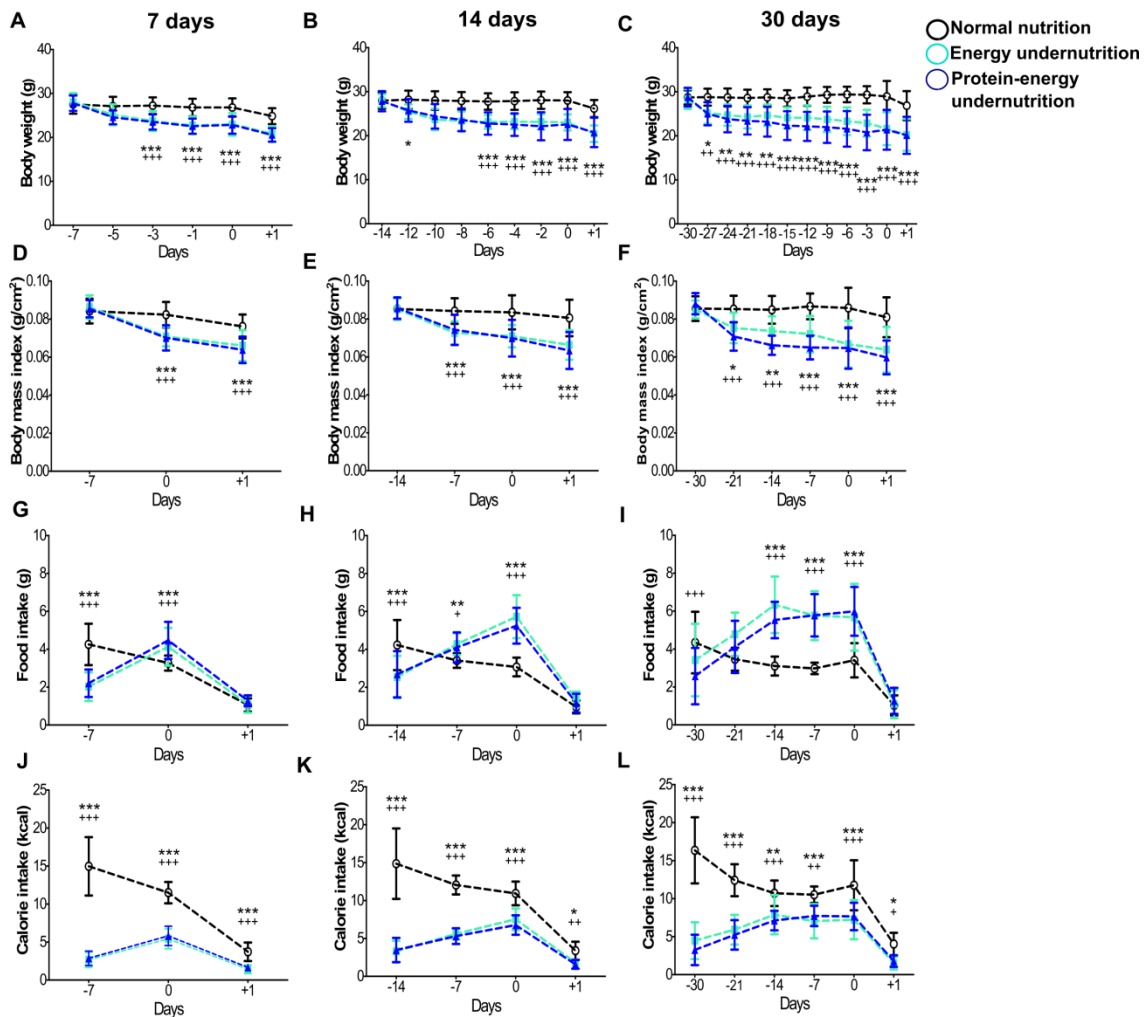

**Supplemental Figure 1. Energy and protein-energy undernutrition induce weight loss despite increased food intake. (A-C)** Body weight, **(D-F)** body-mass index (BMI), **(G-I)** daily food intake, **(J-L)** daily calorie intake in mice receiving normal nutrition, energy-reduced nutrition or protein-energy-reduced nutrition for 7 days **(A, D, G, J)**, 14 days **(B, E, H, K)** or 30 days **(C, F, I, L)**, followed by 30 minutes intraluminal MCAO and 24 hours reperfusion. The x-axis reflects the time-point with respect to tMCAO (=day 0). \*\*\*p<0.001 for energy undernutrition compared with normal nutrition/ ###p<0.001 for protein-energy undernutrition compared with normal nutrition (n=12 animals/ group).

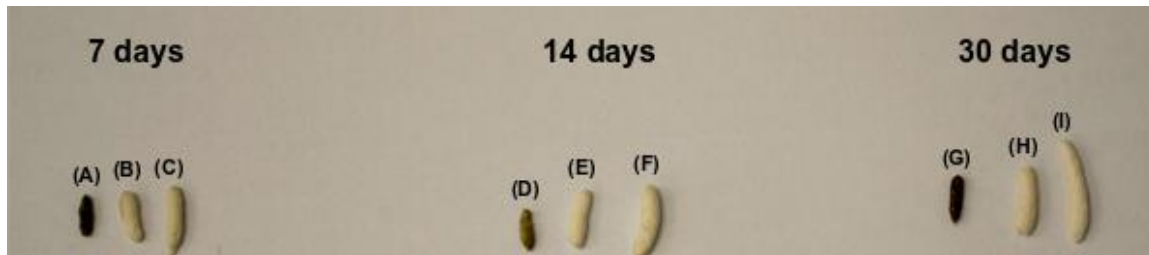

**Supplemental Figure 2. Energy and protein-energy undernutrition induce stool changes indicative of malabsorption syndrome.** Representative stool samples in animals exposed to **(A, D, G)** normal nutrition, **(B, E, H)** energy **under**nutrition and **(C, F, I)** protein-energy **under**nutrition over 7 days **(A-C)**, 14 days **(D-F)** or 30 days **(G-I)**. Stool samples were collected on the last day prior to MCAO.

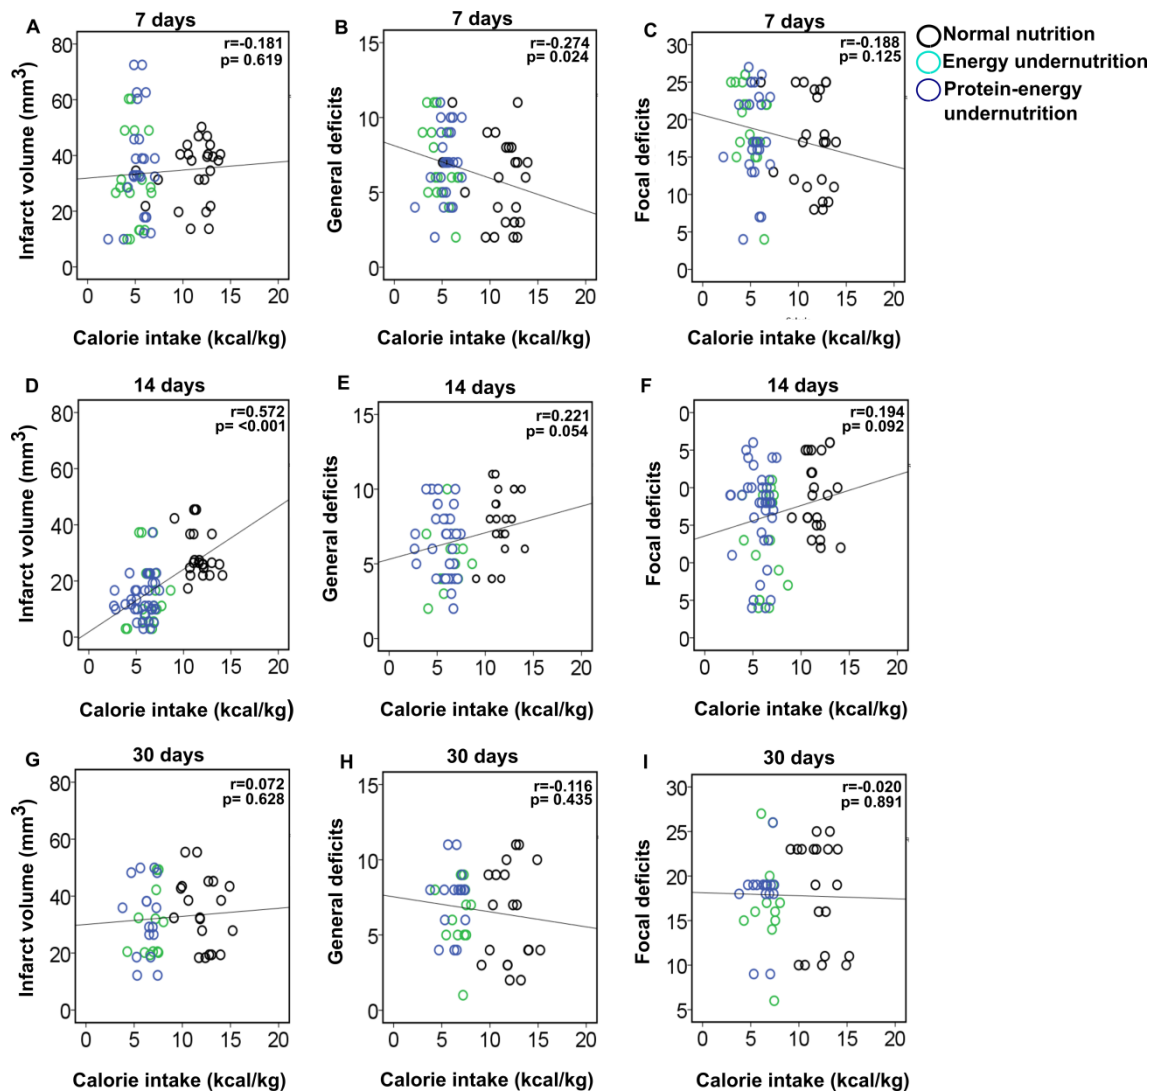

**Supplemental Figure 3. Correlations of daily calorie intake with infarct volume and neurological deficits.** Pearson's correlations of daily calorie intake with **(A, D, G)** infarct volume, **(B, E, H)** general neurological deficits and **(C, F, I)** focal neurological deficits in animals exposed to normal nutrition, energy **under**nutrition and protein-energy **under**nutrition for 7 days **(A-C)**, 14 days **(D-F)** or 30 days **(G-I)**, followed by 30 minutes intraluminal MCAO and 24 hours reperfusion. Correlation coefficients (r), p values and univariate regression lines are shown. Note the negative correlation of calorie intake with general neurological deficits 7 days after food manipulation and the positive correlation of calorie intake with infarct volume 14 days after food manipulation.

**Supplemental Tables:****Supplemental Table 1. List of PCR primers**

| <b>Primer</b>                        |         | <b>Sequence (5'-&gt;3')</b>   | <b>Tm</b> | <b>G-C (%)</b> | <b>Gene bank number</b> |
|--------------------------------------|---------|-------------------------------|-----------|----------------|-------------------------|
| <b><i>Sirt-1</i></b>                 | Forward | GATGACAGAACGTCACACGC          | 59.56     | 55.00          | NM_019812.3             |
|                                      | Reverse | ATTGTTTCGAGGATCGGTGCC         | 60.46     | 55.00          |                         |
| <b><i>Igf-1</i></b>                  | Forward | GACTCAGAAGTCCCCGTCCC          | 61.61     | 65.00          | NM_010512.5             |
|                                      | Reverse | GCATTTTCTGCTCCGTGGG           | 59.49     | 57.89          |                         |
| <b><i>Insr</i></b>                   | Forward | ACCTTCTCTGATGAACGGCG          | 60.11     | 55.00          | NC_000074.6             |
|                                      | Reverse | CTGATATGGGATCCAGGGGG          | 58.71     | 60.00          |                         |
| <b><i>Glut-1</i></b>                 | Forward | GTTAATCGCTTTGGCAGGCGG         | 62.78     | 57.14          | NM_011400.3             |
|                                      | Reverse | AGCATCTCAAAGGACTTGCCC         | 60.62     | 52.38          |                         |
| <b><i>Glut-2</i></b>                 | Forward | GTGCTGCTGGATAAATTGCGC         | 60.27     | 52.38          | NM_031197.2             |
|                                      | Reverse | TCAGCAACCATGAACCAAGGG         | 60.82     | 60.82          |                         |
| <b><i>Il-1<math>\beta</math></i></b> | Forward | TCTTTGAAGTTGACGGACCCC         | 60.20     | 52.38          | NC_000068.7             |
|                                      | Reverse | CTTGTTGATGTGCTGCTGCG          | 60.73     | 55.00          |                         |
| <b><i>Nf-kb</i></b>                  | Forward | TTTCGACTACGCAGTGACGG          | 60.39     | 55.00          | NM_008689.2             |
|                                      | Reverse | GCTAAGTGTAAGACACTGTCCC        | 58.41     | 50.00          |                         |
| <b><i>Nox-4</i></b>                  | Forward | CCTGCTCATTTGGCTGTCCC          | 59.96     | 50.00          | NM_015760.5             |
|                                      | Reverse | GCTTAAACACAATCCTAGGCC         | 59.97     | 55.00          |                         |
| <b><i>Sod-1</i></b>                  | Forward | CATCCACTTCGAGCAGAAGGC         | 61.34     | 57.14          | NM_011434.1             |
|                                      | Reverse | GGTACAGCCTTGTGTATTGTCCC       | 61.18     | 52.17          |                         |
| <b><i>Sod-2</i></b>                  | Forward | GAACAACAGGCCTTATTCCGC         | 61.32     | 60.00          | NM_013671.3             |
|                                      | Reverse | GTGTATCTTTCAGTAACATTCTC<br>CC | 59.31     | 50.00          |                         |
| <b><i>Gpx-3</i></b>                  | Forward | GCACTACAAGAAGAAGACTTGGGC      | 59.77     | 50.00          | NM_001329860.1          |
|                                      | Reverse | TCGAACATACTTGAGACTGGGG        | 59.50     | 50.00          |                         |
| <b><i>Cat</i></b>                    | Forward | GGTATAAGACGCATCAGAAGCC        | 60.49     | 47.83          | NC_000071.6             |
|                                      | Reverse | GGTACTCCTCACTGAACATGCG        | 60.99     | 54.55          |                         |
| <b><math>\beta</math>-Gluc</b>       | Forward | GGTATAAGACGCATCAGAAGCC        | 60.49     | 47.83          | NC_000071.6             |
|                                      | Reverse | GGTACTCCTCACTGAACATGCG        | 60.99     | 54.55          |                         |

**Supplemental Table 2. General observations in mice exposed to energy and protein-energy undernutrition**

| Clinical observations         | Stool size (mm) | Stool color loss (%) | Stool blood beddings (%) | Mild hypoactivity (%) |
|-------------------------------|-----------------|----------------------|--------------------------|-----------------------|
| 7 days                        |                 |                      |                          |                       |
| Normal nutrition              | 3.9±1.1         | 0                    | 0                        | 0                     |
| Energy undernutrition         | 7.0±0.8***      | 100                  | 0                        | 7.1                   |
| Protein-energy undernutrition | 6.6±0.9***      | 100                  | 7.1                      | 21.4                  |
| 14 days                       |                 |                      |                          |                       |
| Normal nutrition              | 2.9±0.3         | 0                    | 0                        | 0                     |
| Energy undernutrition         | 7.4±0.5***      | 100                  | 5.6                      | 22                    |
| Protein-energy undernutrition | 8.9±2.0***      | 100                  | 5.6                      | 5.6                   |
| 30 days                       |                 |                      |                          |                       |
| Normal nutrition              | 3.4±0.6         | 0                    | 0                        | 0                     |
| Energy undernutrition         | 9.1±1.2***      | 100                  | 15.4                     | 38.5                  |
| Protein-energy undernutrition | 14.3±1.3***     | 100                  | 30.8                     | 54                    |

\*\*\*p<0.001 compared with corresponding normal nutrition.

**Supplemental Table 3. Plasma lipid and glucose levels in mice exposed to energy and protein-energy undernutrition**

|                               | Cholesterol (mg/dl) | LDL (mg/dl) | Triglycerides (mg/dl) | Glucose (mg/dl) |
|-------------------------------|---------------------|-------------|-----------------------|-----------------|
| 7 days                        |                     |             |                       |                 |
| Normal nutrition              | 244.0±94.0          | 30.4±20.0   | 216.0±142.0           | 89.4±51.0       |
| Energy undernutrition         | 253.0±108.0         | 25.3±18.0   | 224.0±113.0           | 84.4±40.3       |
| Protein-energy undernutrition | 219.4±53.0          | 11.6±3.3*   | 197.0±69.0            | 77.1±25.7       |
| 14 days                       |                     |             |                       |                 |
| Normal nutrition              | 244.5±130.3         | 22.5±23.0   | 225.0±155.9           | 115.0±53.7      |
| Energy undernutrition         | 208.0±99.1          | 20.0±21.5   | 244.0±126.1           | 97.5±52.0       |
| Protein-energy undernutrition | 270.0±110.1         | 25.5±22.5   | 256.0±107.7           | 100.0±27.7      |
| 30 days                       |                     |             |                       |                 |
| Normal nutrition              | 252.1±120.0         | 32.7±29.7   | 259.3±147.2           | 97.7±46.0       |
| Energy undernutrition         | 317.8±101.0         | 30.5±17.3   | 333.3±113.7           | 73.6±50.0       |
| Protein-energy undernutrition | 218.6±94.8          | 20.7±13.0   | 198.6±130.4           | 85.0±23.5       |

\*p<0.05 compared with corresponding normal nutrition.
